# Supplementary material for: Combination Treatment with GSK126 and Pomalidomide Induces B-Cell Differentiation in EZH2 Gain-of-Function Mutant Diffuse Large B-Cell Lymphoma
Source: PubMed Central journal article supplement (PMC7565736; doi:10.3390/cancers12092541), 2020-09-07
Supplement: cancers-12-02541-s001.pdf [file cancers-12-02541-s001.pdf]

# Supplementary Materials:

## Combination Treatment with GSK126 And Pomalidomide Induces B-Cell Differentiation in EZH2 Gain-of-Function Mutant Diffuse Large B-Cell Lymphoma

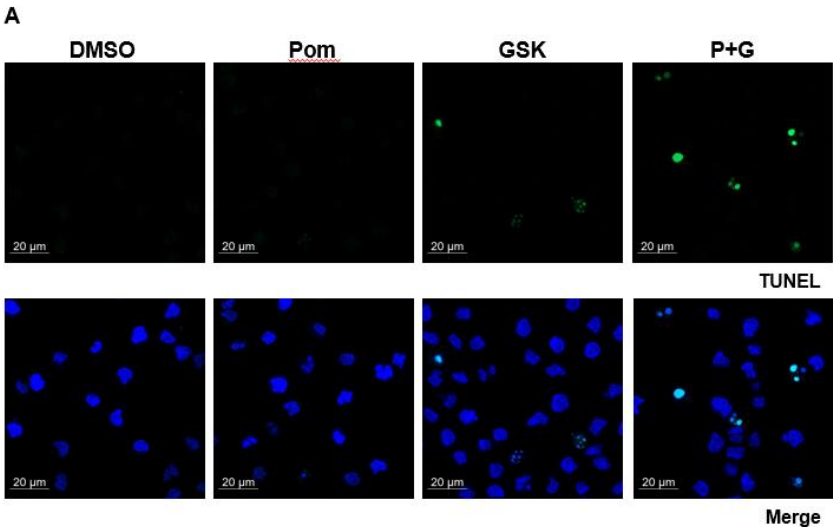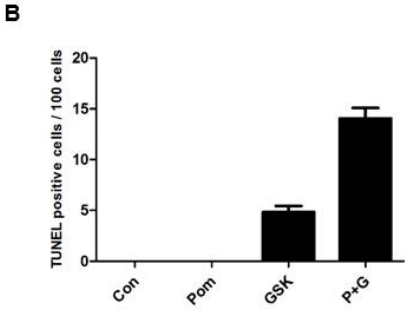

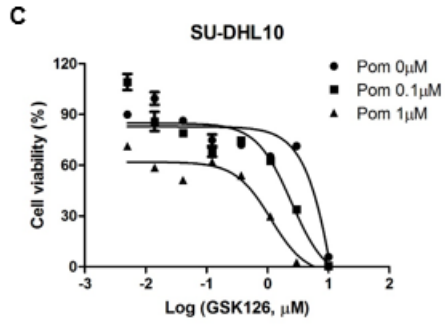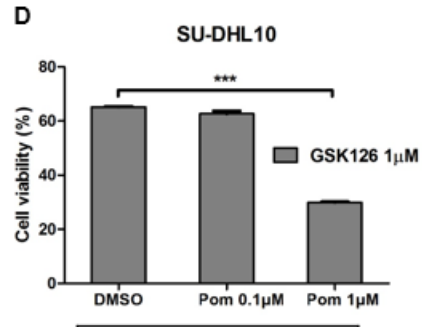

| Combination index (CI)    |                                |       |
|---------------------------|--------------------------------|-------|
| GSK-126 ( $\mu\text{M}$ ) | Pomalidomide ( $\mu\text{M}$ ) |       |
| 1                         | 0.1                            | 5.432 |
| 1                         | 1                              | 0.249 |

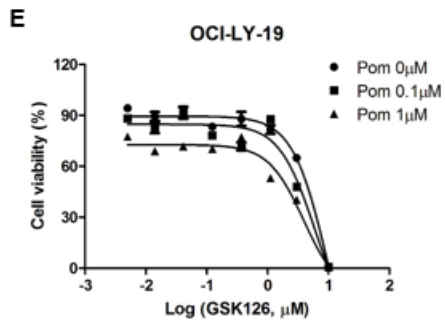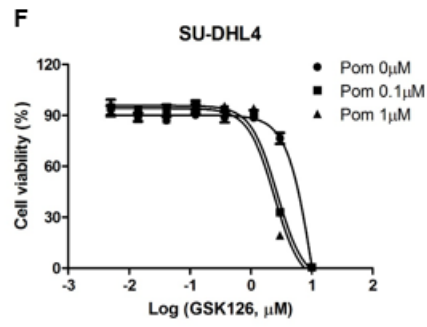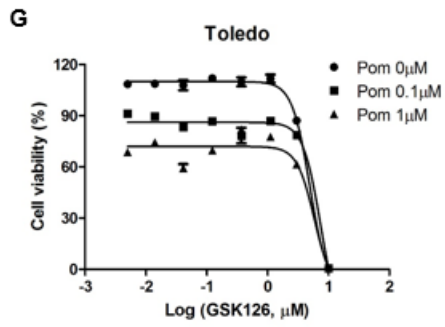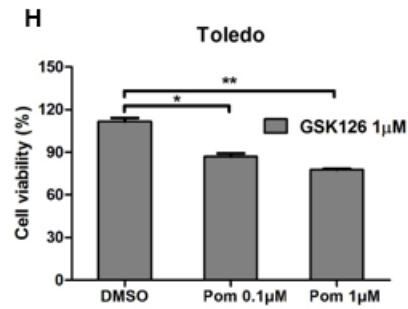

| Combination index (CI)    |                                |       |
|---------------------------|--------------------------------|-------|
| GSK-126 ( $\mu\text{M}$ ) | Pomalidomide ( $\mu\text{M}$ ) |       |
| 1                         | 0.1                            | 17.21 |
| 1                         | 1                              | 5.49  |

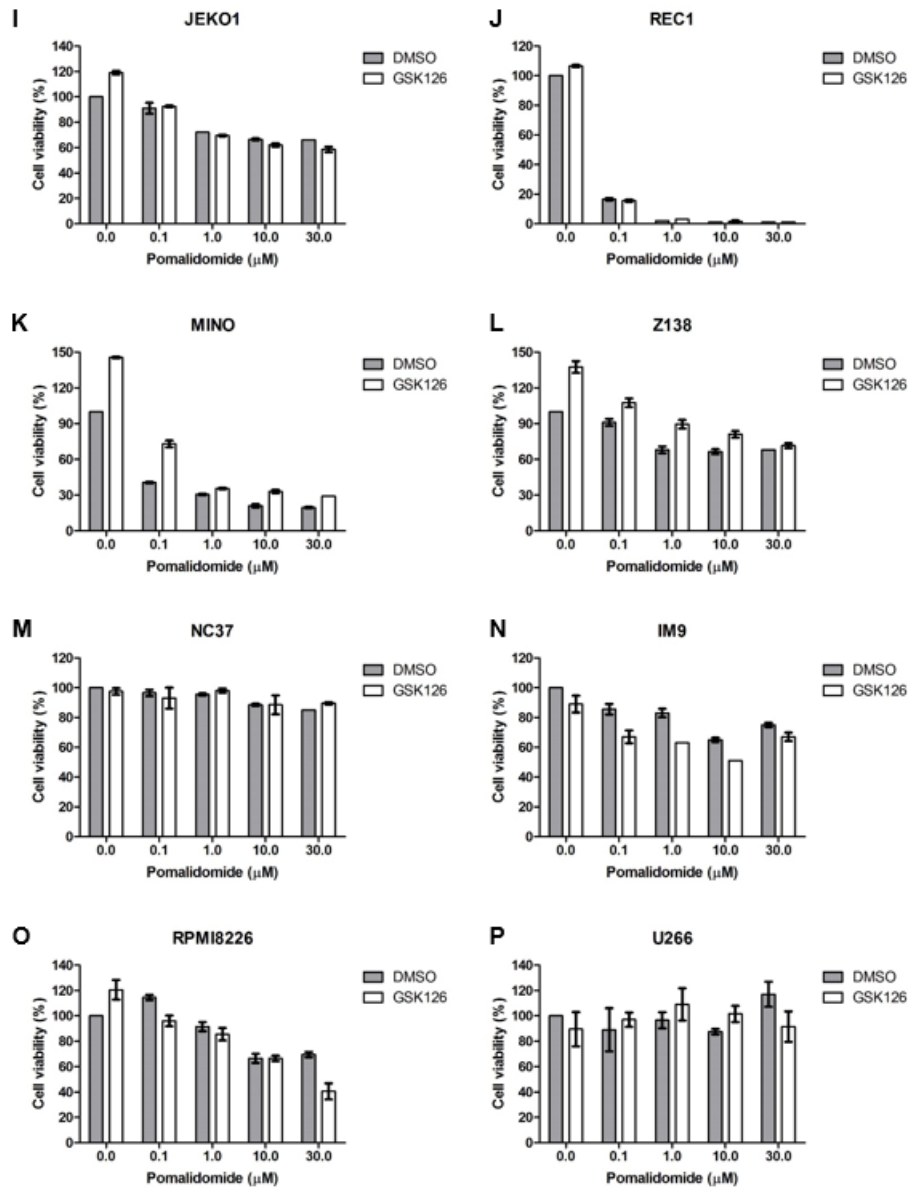

**Figure S1.** Cytotoxic effect on various cancer cell lines (A,B) Detection and quantification of DNA fragmentation in apoptotic WSU-DLCL2 cells by TUNEL assay after 48 hr treatment of GSK126 and pomalidomide. (C-H) Effect of GSK126 and pomalidomide combination treatment on the viability of SU-DHL10, OCI-LY-19, SU-DHL4 and Toledo in cell culture on day 6. Combination index (CI) was calculated by CompuSyn software. (I-P) Cell viability assay of EZH2 inhibitor GSK126 and pomalidomide combination treatment in myeloma cell line IM9, RPMI8226, U266 (I-K), mantle cell lymphoma JEKO1, REC1, Mino, Z138 (L-O), and burkitt's lymphoma NC37 (P) cell lines on day 6 (\*  $p$ -value < 0.05, \*\*  $p$ -value < 0.005, \*\*\*  $p$ -value < 0.0001, student  $t$ -test).

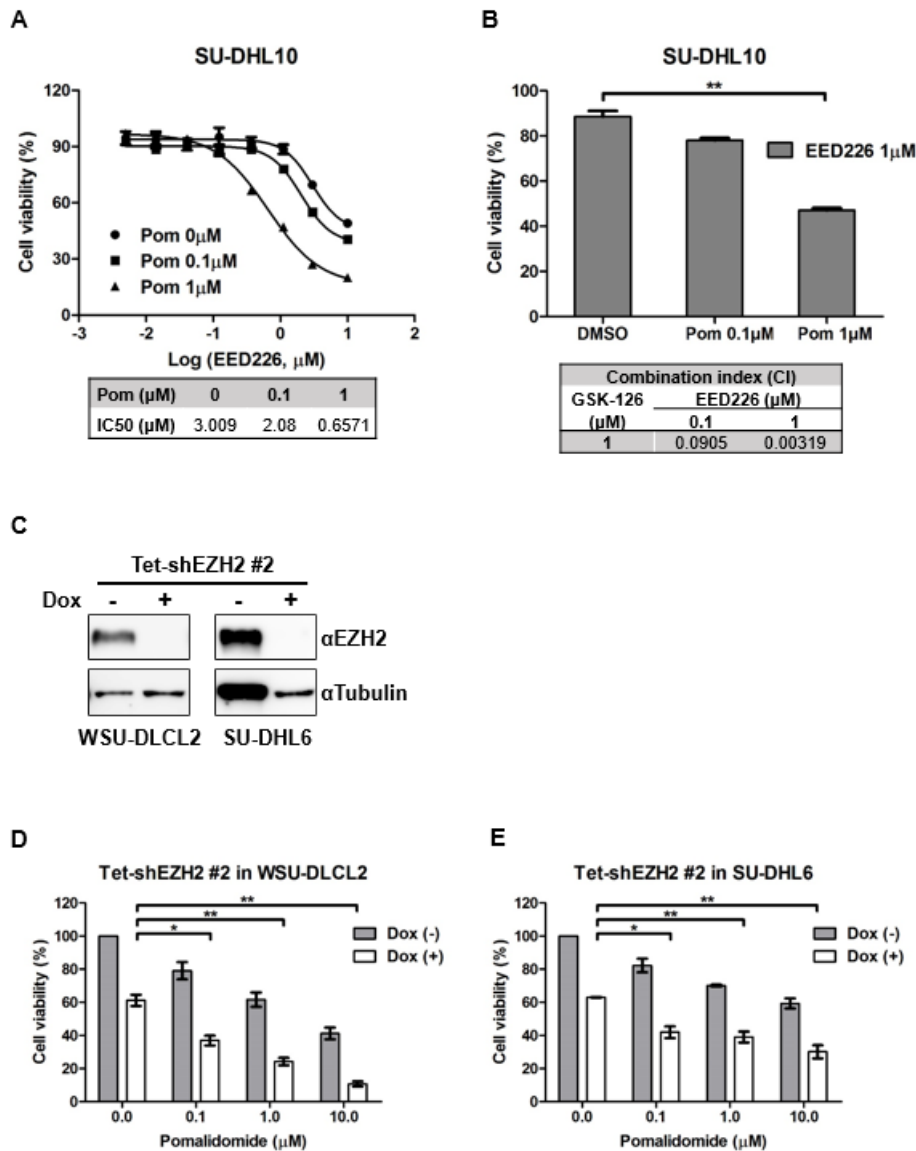

**Figure S2.** Inhibition or *EZH2* knockdown combined with pomalidomide synergistically inhibits proliferation of *EZH2*-mutant DLBCL cells (A) Effects of pomalidomide and EED226 on cell viability. SU-DHL10 cells were treated with the indicated concentrations of EED226 and pomalidomide (Pom) for 6 days. (B) Combination Index (CI) values obtained for SU-DHL10 cells treated with different concentrations of pomalidomide in combination with EED226 (1  $\mu\text{M}$ ). (C) Inducible shEZHZ2 targeting different region (#2) stable cell lines were generated in WSU-DLCL2 and SU-DHL6. Western blot validated *EZH2* knockdown after 1  $\mu\text{g}/\text{ml}$  of doxycycline (Dox) treatment for 6 days.  $\alpha$  tubulin was used as a loading control. (D,E) Effect of *EZH2* knockdown and pomalidomide simultaneously on the viability. WSU-DLCL2 were treated pomalidomide as indicated concentrations and Doxycycline (Dox)- positive (1  $\mu\text{g}/\text{ml}$ ) or negative (water) for 6 days (\*  $p$ -value < 0.05, \*\*  $p$ -value < 0.005, \*\*\*  $p$ -value < 0.0001, student  $t$ -test).

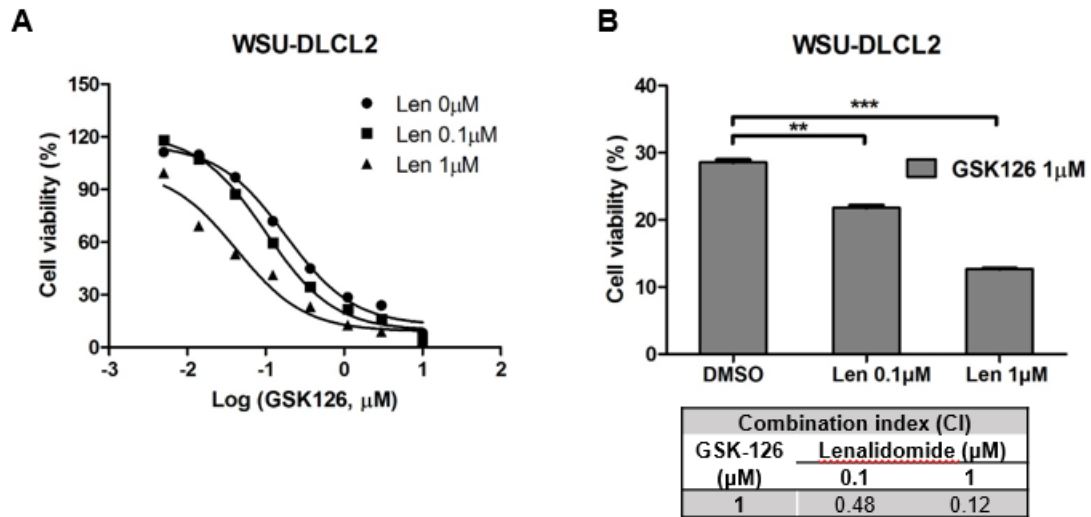

**Figure S3.** Effect of GSK126 with lenalidomide in WSU-DLCL2 cells. **(A)** Effects of lenalidomide and GSK126 on cell viability. WSU-DLCL2 was treated with the indicated concentrations of GSK126 and lenalidomide (Len) for 6 days. **(B)** Combination Index (CI) values obtained in WSU-DLCL2 treated with different concentrations of the lenalidomide in combination with the GSK126 (1  $\mu\text{M}$ ) (\*\*  $p$ -value < 0.005, \*\*\*  $p$ -value < 0.0001, student t-test).

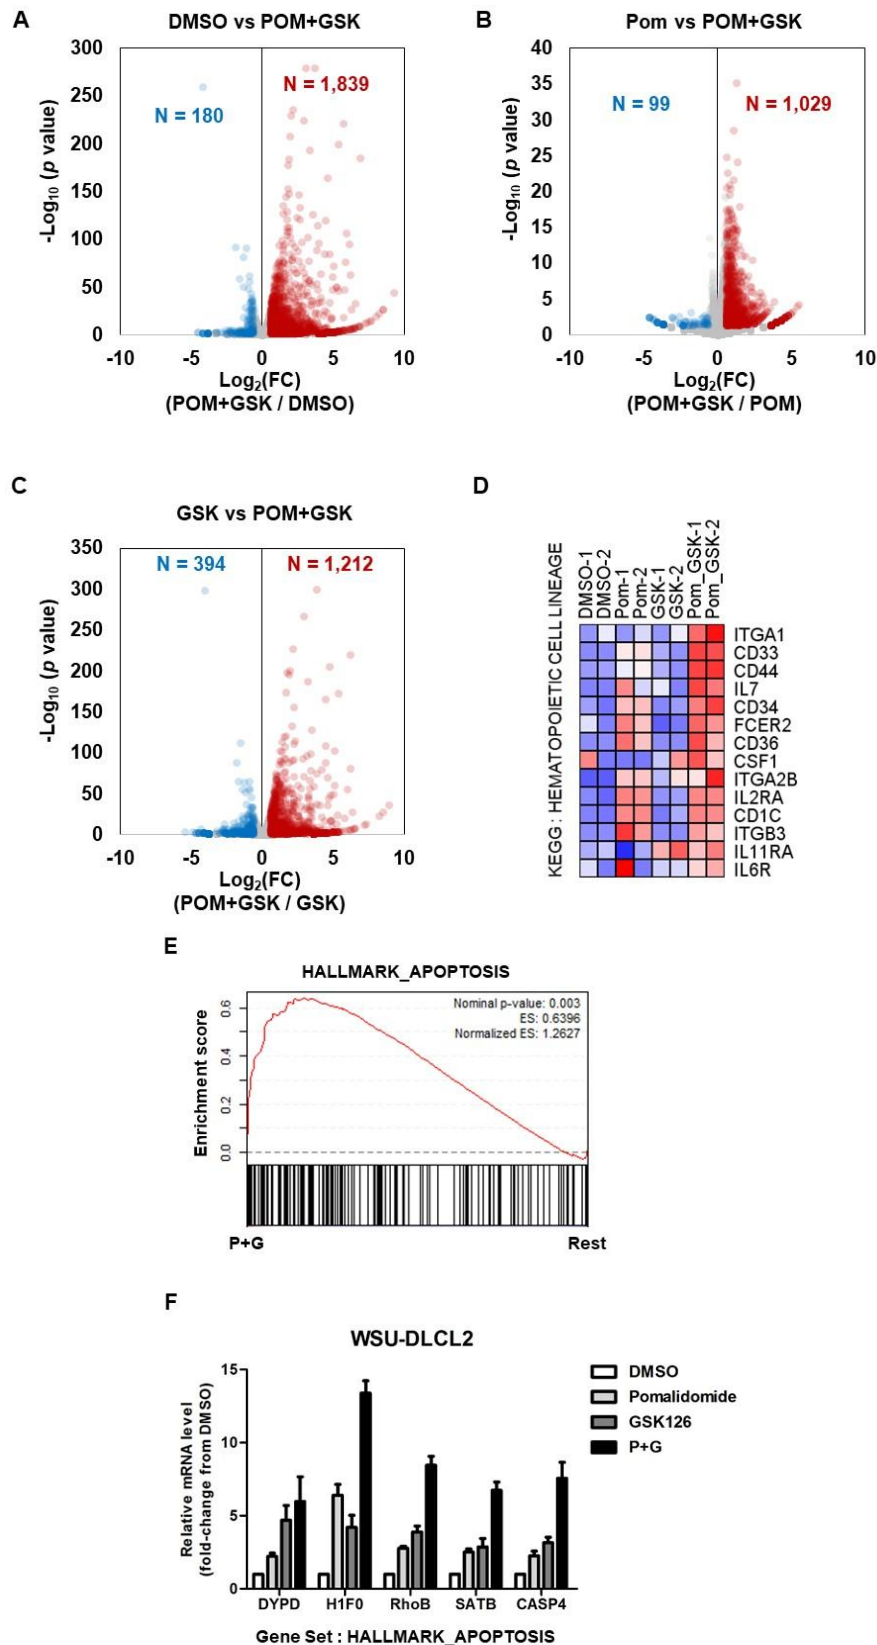

**Figure S4.** Whole transcriptomic comparative analysis between POM+GSK and rest. (A–C) Volcano plot showing the comparison of the whole transcriptomes of between POM+GSK and rest. (A) POM+GSK vs DMSO. (B) POM+GSK vs POM. (C) POM+GSK vs GSK. Reds: up-regulated genes; Blues: down-regulated genes. (D) Heatmap of Hematopoietic cell lineage gene sets. (E) GSEA enrichment plot of apoptosis pathway. (F) mRNA levels of genes related to apoptosis in GSEA were measured in WSU-DLCL2. Data are shown as mean  $\pm$  standard error of mean (SEM).

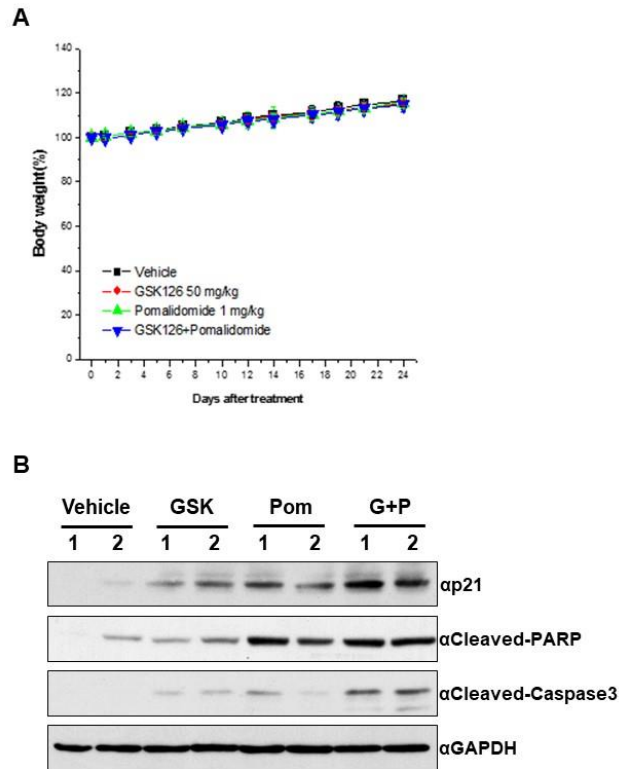

**Figure S5.** Specific pathogen-free CB17/SCID mice ( $n = 6$ ) were implanted subcutaneously with WSU-DLCL2 cells ( $1 \times 10^6$  cells) and treated with vehicle, GSK126 (50 mg/kg), pomalidomide (1 mg/kg) and GSK126 + pomalidomide. **(A)** Body weights were measured three times a week for 24 days. **(B)** Immunoblot of apoptotic markers of each two representative tumor tissues sample of mouse treated GSK126 and pomalidomide, each alone and vehicle. GAPDH was loading control.

**A**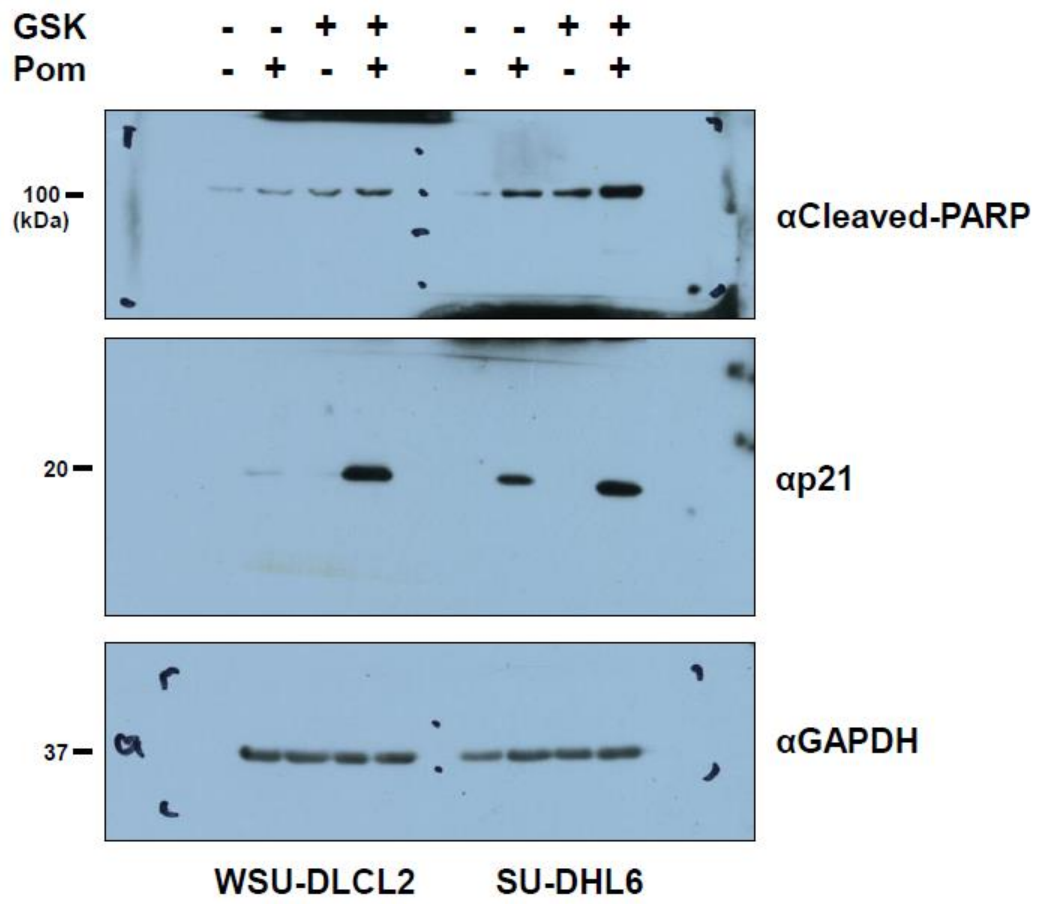**B**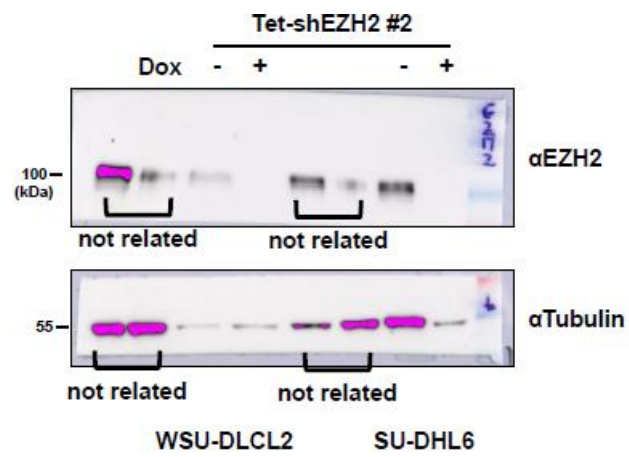



**C**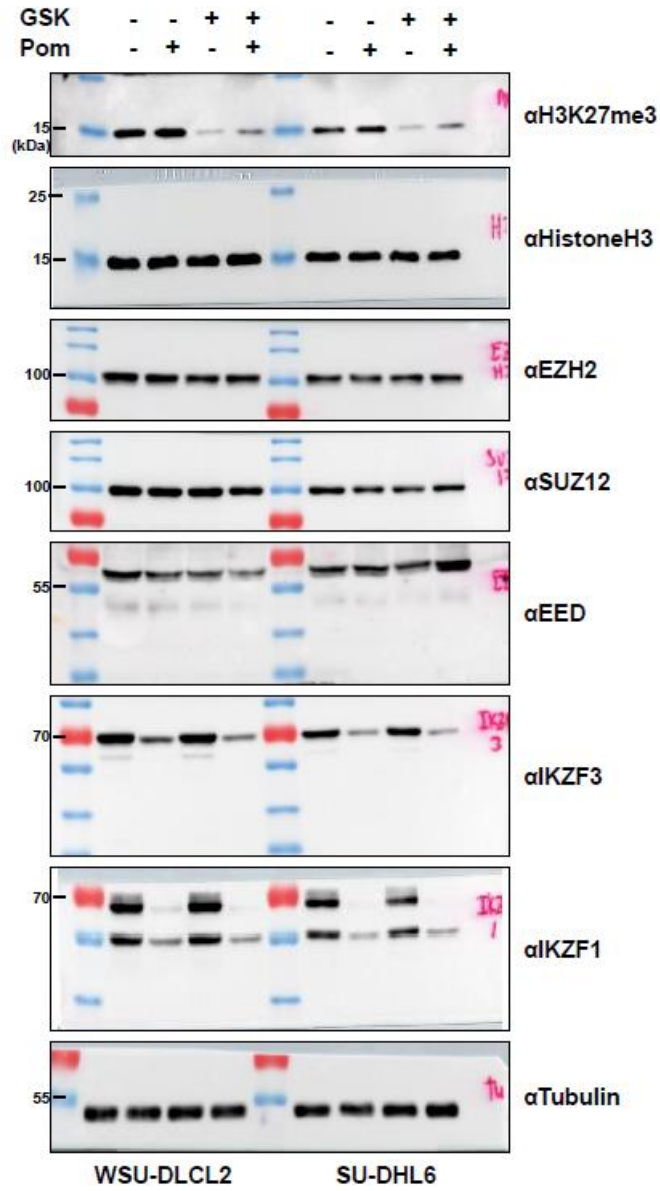**D**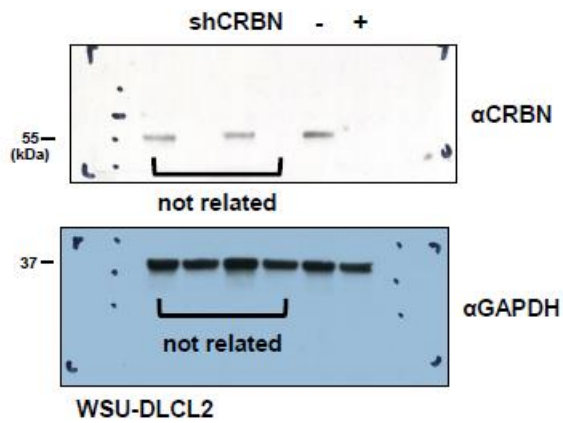

**E**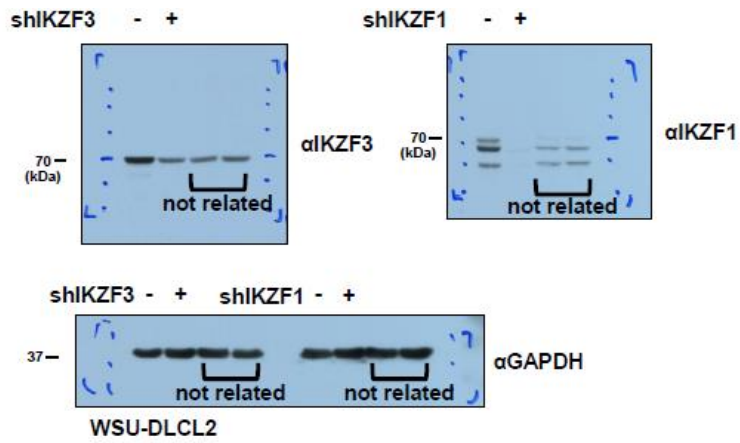**F**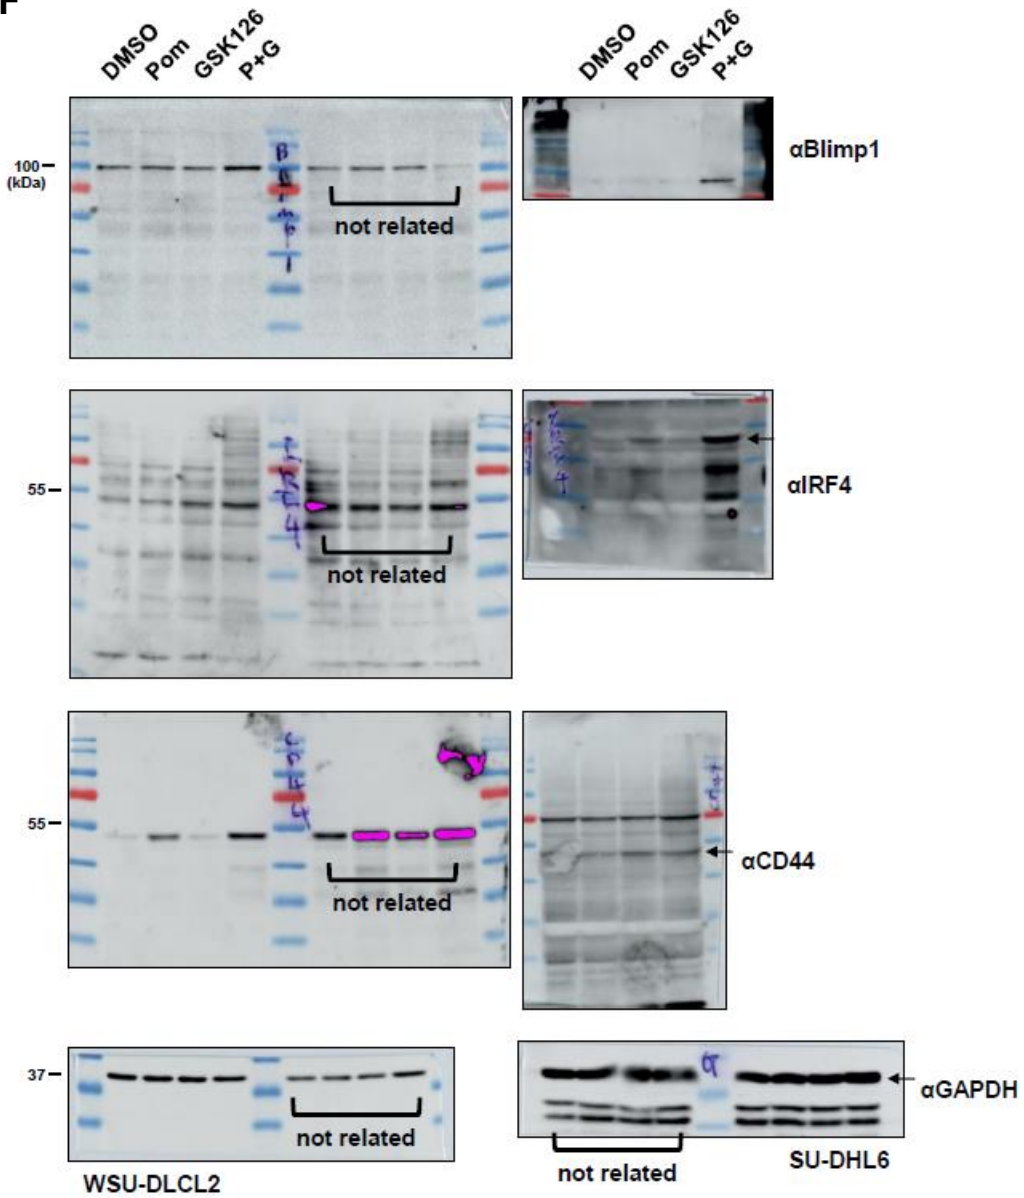

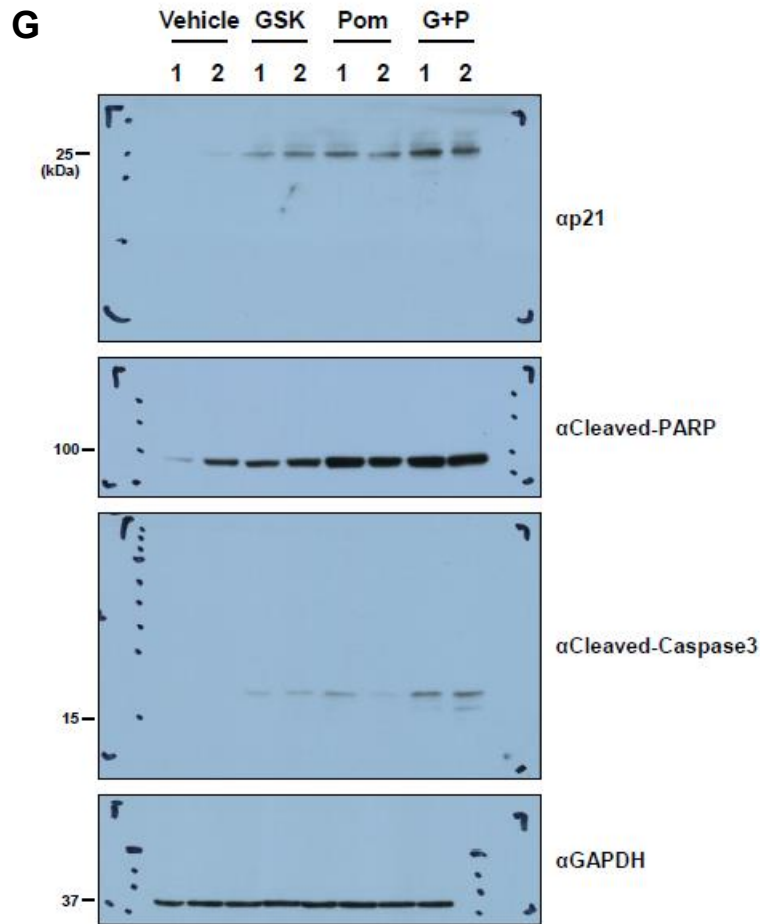

**Figure S6.** Original images of western blot. Original HRP-conjugated antibody images of (A) Figure 1E, (B) Figure 2E, (C) Figure 2H, (D) Figure 3A, (E) Figure 3D, (F) Figure 4J, (G) Supplementary figure 5B.

**Table S1.** Antibodies used for detect proteins.

| Cat No.    | Antibody                       | Company       | RRID        |
|------------|--------------------------------|---------------|-------------|
| ab176842   | Histone H3                     | abcam         | AB_2493104  |
| ab6002     | H3K27me3                       | abcam         | AB_305237   |
| ab198287   | PRDM1/Blimp1                   | abcam         | none        |
| ab133590   | MUM1/IRF4                      | abcam         | none        |
| ab157107   | CD44                           | abcam         | none        |
| ab16667    | Ki-67                          | abcam         | AB_302459   |
| #5246s     | EZH2                           | CST           | AB_10694683 |
| #3737S     | SUZ12                          | CST           | AB_2196850  |
| #14859S    | IKZF1 (Ikaros)                 | CST           | AB_2744523  |
| #15103     | IKZF3 (Aiolos)                 | CST           | AB_2744524  |
| #2947S     | p21                            | CST           | AB_823586   |
| #9664S     | cleaved-caspase3               | CST           | AB_2070042  |
| #5625S     | cleaved-PARP                   | CST           | AB_10699459 |
| #7074S     | anti-Rabbit IgG HRP conjugated | CST           | AB_2099233  |
| HPA045910  | CRBN                           | Sigma aldrich | AB_10960409 |
| A9044      | anti-Mouse IgG HRP conjugated  | Sigma aldrich | AB_258431   |
| T5168      | αTubulin                       | Sigma aldrich | AB_477579   |
| 16818-1-AP | EED                            | Proteintech   | AB_2262065  |
| sc-47724   | GAPDH                          | Santa Cruz    | AB_627678   |

**Table S2.** shRNA targeting sequences for knockdown cell lines.

| Gene    | Target Sequence (5' - 3')                                   |
|---------|-------------------------------------------------------------|
| CRBN    | GGGCTTGCAACTTGAATCTGATACTCGAGTATCAGATTCAAGTTGCAAGCTTTTTTG   |
| IKZF1   | CCGGCCGTTGGTAAACCTCACAAATCTCGAGATTTGTGAGGTTTACCAACGGTTTTTG  |
| IKZF3   | CCGGGCTCTCGTACTGGACAGATTACTCGAGTAATCTGTCCAGTACGAGAGCTTTTT   |
| EZH2 #1 | CCGGGCTAGGTTAATTGGGACCAAACCTCGAGTTTGGTCCCAATTAACCTAGCTTTTTG |
| EZH2 #2 | CCGGCCCAACATAGATGGACCAAATCTCGAGATTTGGTCCATCTATGTTGGGTTTTTG  |

**Table S3.** Primer sequences for RT-qPCR.

| Gene    | Fwd (5' - 3')           | Rev (5' - 3')              |
|---------|-------------------------|----------------------------|
| IL7     | CTCCCCTGATCCTTGTTCTG    | TCATTATTCAGGCAATTGCTACC    |
| CD33    | GAACACCCCCGATCTTCTCC    | TGAGCACCGAGGAGTGAGTA       |
| ITGA1   | GGTGCTTATTGGTTCTCCGTTAG | TTCTCCTTTACTTCTGTGACATTGG  |
| CSF1    | ATGACAGACAGGTGGAAGTCCAG | TCACACAACCTTCAGTAGGTTCCAGG |
| CD44    | CACGTGGAATACACCTGCAA    | GACAAGTTTTGGTGGCAGC        |
| IRF4    | AAAGGAAAGTTCCGAGAAGG    | CGAAGGGTAAGGCGTTGT         |
| Blimp-1 | TCGGGTCGTTTACCCCATC     | CACAGCGCTCAGGCCATTA        |
| XBP1    | TTACGAGAGAAAACATCATGGCC | GGGTCCAAGTTGTCCAGAATGC     |
| Bcl6    | CATGCAGAGATGTGCCTCCACA  | TCAGAGAAGCGGCAGTCACACT     |
| CD10    | GGGGAGGCTTTATGTGGAAG    | CTCGGATCTGTGCAATCAAA       |
| SPIB    | GGAGTGCTGCCCTGCCATAA    | CCCCACCCAGATGAGATT         |
| OBF     | AGGTGAGGAGGATGTGATGACG  | CGAATGCTTCTTGTCTGTGACA     |
| DYPD    | GTTCTGGCTACCAGGCTAT     | CATAAGGTGTTGTCCTGGAA       |
| H1F0    | CTGGCTGCCACGCCAAGAA     | CGGCCCTCTTGGCACTGGAC       |
| RhoB    | CATTCTGACCACACTTGTACGC  | GGTTTCTTTTCCCTCTCCTTGT     |
| SATB    | CCTGGATTAGCCCTTTGG      | CTGTGTGGTGGAAACATTATG      |
| CASP4   | TTCTGGCAATTGAAAATGG     | TGCAAGCTGTACTAATGAAGGTG    |
| ZNF98   | AGGAGTGGCAATGCCTGGACAC  | TCCTTGCTCCAGACAGGTGATC     |
| HRPT1   | GACCAGTCAACAGGGGACAT    | AACACTTCGTGGGGTCTTTTC      |
